# Supplementary material for: CXCR5+PD-1+ follicular helper CD8 T cells control B cell tolerance
Source: PubMed Central journal article supplement (PMC6765049; doi:10.1038/s41467-019-12446-5), 2019-09-27
Supplement: 41467_2019_12446_MOESM3_ESM.pdf [file 41467_2019_12446_MOESM3_ESM.pdf]

## Reporting Summary

Nature Research wishes to improve the reproducibility of the work that we publish. This form provides structure for consistency and transparency in reporting. For further information on Nature Research policies, see [Authors & Referees](#) and the [Editorial Policy Checklist](#).

### Statistics

For all statistical analyses, confirm that the following items are present in the figure legend, table legend, main text, or Methods section.

n/a Confirmed

- The exact sample size ( $n$ ) for each experimental group/condition, given as a discrete number and unit of measurement
- A statement on whether measurements were taken from distinct samples or whether the same sample was measured repeatedly
- The statistical test(s) used AND whether they are one- or two-sided  
*Only common tests should be described solely by name; describe more complex techniques in the Methods section.*
- A description of all covariates tested
- A description of any assumptions or corrections, such as tests of normality and adjustment for multiple comparisons
- A full description of the statistical parameters including central tendency (e.g. means) or other basic estimates (e.g. regression coefficient) AND variation (e.g. standard deviation) or associated estimates of uncertainty (e.g. confidence intervals)
- For null hypothesis testing, the test statistic (e.g.  $F$ ,  $t$ ,  $r$ ) with confidence intervals, effect sizes, degrees of freedom and  $P$  value noted  
*Give  $P$  values as exact values whenever suitable.*
- For Bayesian analysis, information on the choice of priors and Markov chain Monte Carlo settings
- For hierarchical and complex designs, identification of the appropriate level for tests and full reporting of outcomes
- Estimates of effect sizes (e.g. Cohen's  $d$ , Pearson's  $r$ ), indicating how they were calculated

*Our web collection on [statistics for biologists](#) contains articles on many of the points above.*

### Software and code

Policy information about [availability of computer code](#)

Data collection

All instruments, computer code and software used to collect data were described in details in the Methods section.

Data analysis

All computer code and software for data analysis were described in details in the Methods section.

For manuscripts utilizing custom algorithms or software that are central to the research but not yet described in published literature, software must be made available to editors/reviewers. We strongly encourage code deposition in a community repository (e.g. GitHub). See the Nature Research [guidelines for submitting code & software](#) for further information.

### Data

Policy information about [availability of data](#)

All manuscripts must include a [data availability statement](#). This statement should provide the following information, where applicable:

- Accession codes, unique identifiers, or web links for publicly available datasets
- A list of figures that have associated raw data
- A description of any restrictions on data availability

The authors declare that the data supporting the findings are available in the article, the supplementary information, the Source data file and the NCBI Gene Expression Omnibus (GEO), GSE136642.

### Field-specific reporting

Please select the one below that is the best fit for your research. If you are not sure, read the appropriate sections before making your selection.

- Life sciences       Behavioural & social sciences       Ecological, evolutionary & environmental sciences

## Life sciences study design

All studies must disclose on these points even when the disclosure is negative.

|                 |                                                                                                                                   |
|-----------------|-----------------------------------------------------------------------------------------------------------------------------------|
| Sample size     | Sample sizes were determined based on the principle of using the minimum number of animals to provide adequate statistical power. |
| Data exclusions | None                                                                                                                              |
| Replication     | All experiments are representative of at least two independent experiments.                                                       |
| Randomization   | Experimental mice were randomly allocated.                                                                                        |
| Blinding        | None                                                                                                                              |

## Reporting for specific materials, systems and methods

We require information from authors about some types of materials, experimental systems and methods used in many studies. Here, indicate whether each material, system or method listed is relevant to your study. If you are not sure if a list item applies to your research, read the appropriate section before selecting a response.

### Materials & experimental systems

### Methods

| n/a                                 | Involvement in the study                                        |
|-------------------------------------|-----------------------------------------------------------------|
| <input type="checkbox"/>            | <input checked="" type="checkbox"/> Antibodies                  |
| <input checked="" type="checkbox"/> | <input type="checkbox"/> Eukaryotic cell lines                  |
| <input checked="" type="checkbox"/> | <input type="checkbox"/> Palaeontology                          |
| <input type="checkbox"/>            | <input checked="" type="checkbox"/> Animals and other organisms |
| <input checked="" type="checkbox"/> | <input type="checkbox"/> Human research participants            |
| <input checked="" type="checkbox"/> | <input type="checkbox"/> Clinical data                          |

| n/a                                 | Involvement in the study                           |
|-------------------------------------|----------------------------------------------------|
| <input checked="" type="checkbox"/> | <input type="checkbox"/> ChIP-seq                  |
| <input type="checkbox"/>            | <input checked="" type="checkbox"/> Flow cytometry |
| <input checked="" type="checkbox"/> | <input type="checkbox"/> MRI-based neuroimaging    |

## Antibodies

|                 |                                                                                                          |
|-----------------|----------------------------------------------------------------------------------------------------------|
| Antibodies used | The information for all antibodies is included in the Methods section and the Supplementary Information. |
| Validation      | All antibodies were validated by the manufacturers.                                                      |

## Animals and other organisms

Policy information about [studies involving animals](#); [ARRIVE guidelines](#) recommended for reporting animal research

|                         |                                                                                                                                                                                                                                                                                 |
|-------------------------|---------------------------------------------------------------------------------------------------------------------------------------------------------------------------------------------------------------------------------------------------------------------------------|
| Laboratory animals      | CD8CreStat5+/, CD8CreStat5+/-, CD8CreStat5fl/fl mice, IgHEL transgenic (C57BL/6, MD4), sHEL transgenic (C57BL/6, ML5), BM1, Rag-1-deficient, CD45.1 congenic mice, CXCR5-deficient, PD-1-deficient, Lag3-deficient and CD40-deficient mice, and CD4CreBcl6fl/fl mice were used. |
| Wild animals            | None                                                                                                                                                                                                                                                                            |
| Field-collected samples | None                                                                                                                                                                                                                                                                            |
| Ethics oversight        | The animal experiments were performed using protocols approved by the Institute Animal Care and Use Committee at the Medical College of Wisconsin.                                                                                                                              |

Note that full information on the approval of the study protocol must also be provided in the manuscript.

### Plots

Confirm that:

- The axis labels state the marker and fluorochrome used (e.g. CD4-FITC).
- The axis scales are clearly visible. Include numbers along axes only for bottom left plot of group (a 'group' is an analysis of identical markers).
- All plots are contour plots with outliers or pseudocolor plots.
- A numerical value for number of cells or percentage (with statistics) is provided.

### Methodology

- |                           |                                                                                                                                                                                                 |
|---------------------------|-------------------------------------------------------------------------------------------------------------------------------------------------------------------------------------------------|
| Sample preparation        | Single-cell suspensions of mouse thymus, spleen and bone marrow cells were treated with Gey's solution to remove RBC and then stained with a combination of fluorescence-conjugated antibodies. |
| Instrument                | LSR II (Becton Dickinson)                                                                                                                                                                       |
| Software                  | FACSDiva                                                                                                                                                                                        |
| Cell population abundance | The purity of cells sorted for sequencing was greater than 99% as examined by a post-sort FACS analysis.                                                                                        |
| Gating strategy           | Gating strategy for all flow cytometry experiments is included in the Supplementary Information.                                                                                                |
- Tick this box to confirm that a figure exemplifying the gating strategy is provided in the Supplementary Information.
